# Supplementary material
Source: MDPI journal article supplement (https://www.mdpi.com/1999-4907/13/9/1510)
Supplement: s1 [file s1]

# Supplementary Materials

## Morphological Characteristics of Bamboo Panel Milling Dust Derived from Different Average Chip Thicknesses

Yunqi Cui <sup>1</sup>, Jian Yin <sup>1</sup>, Yitong Cai <sup>1</sup>, Huimin Wang <sup>1</sup>, Tao Ding <sup>1</sup>, and Nanfeng Zhu <sup>1,\*</sup>

<sup>1</sup> College of Material Science and Engineering, Nanjing Forestry University, 159 Longpan Rd., Nanjing 210037, China

\* Correspondence: znanf@njfu.edu.cn; Tel.: +86-133-8203-3964

**Table S1.** Independent sample t-test of AR of Group I and Group II under the same average chip thickness

| Average chip thickness / mm |                         | Levene's test for equality of variances |       | T-test for equality of means |    |                 |                 |                       |                                           |
|-----------------------------|-------------------------|-----------------------------------------|-------|------------------------------|----|-----------------|-----------------|-----------------------|-------------------------------------------|
|                             |                         | F                                       | Sig.  | t                            | df | Sig. (2-tailed) | Mean difference | Std. error difference | 95% Confidence Interval of the Difference |
|                             |                         |                                         |       |                              |    |                 |                 |                       | Lower Upper                               |
| 0.05                        |                         | 0.016                                   | 0.899 | 0.118                        | 36 | 0.907           | 0.486           | 4.111                 | -7.851 8.823                              |
| 0.08                        |                         | 0.006                                   | 0.939 | 0.086                        | 36 | 0.932           | 0.358           | 4.146                 | -8.050 8.766                              |
| 0.11                        | Equal variances assumed | 0.001                                   | 0.976 | -0.021                       | 36 | 0.983           | -0.093          | 4.359                 | -8.932 8.747                              |
| 0.14                        |                         | 0.002                                   | 0.963 | -0.166                       | 36 | 0.869           | -0.740          | 4.445                 | -9.755 8.275                              |
| 0.17                        |                         | 0.002                                   | 0.969 | -0.103                       | 36 | 0.918           | -0.453          | 4.394                 | -9.364 8.458                              |
| 0.2                         |                         | 0.000                                   | 0.998 | -0.071                       | 36 | 0.944           | -0.301          | 4.267                 | -8.955 8.352                              |

**Table S2.** Independent sample t-test of roundness of Group I and Group II under the same average chip thickness

| Average<br>chip<br>thickness /<br>mm |                               | Levene's<br>test for<br>equality of<br>variances |       | T-test for equality of means |    |                 |                    |                          |                                                 |       |
|--------------------------------------|-------------------------------|--------------------------------------------------|-------|------------------------------|----|-----------------|--------------------|--------------------------|-------------------------------------------------|-------|
|                                      |                               | F                                                | Sig.  | t                            | df | Sig. (2-tailed) | Mean<br>difference | Std. error<br>difference | 95% Confidence<br>Interval of the<br>Difference |       |
|                                      |                               |                                                  |       |                              |    |                 |                    |                          | Lower                                           | Upper |
| 0.05                                 |                               | 0.000                                            | 0.992 | 0.018                        | 36 | 0.986           | 0.067              | 3.775                    | -7.588                                          | 7.723 |
| 0.08                                 |                               | 0.008                                            | 0.930 | -0.367                       | 36 | 0.716           | -1.373             | 3.744                    | -8.965                                          | 6.220 |
| 0.11                                 | Equal<br>variances<br>assumed | 0.002                                            | 0.961 | -0.475                       | 36 | 0.638           | -1.764             | 3.717                    | -9.303                                          | 5.775 |
| 0.14                                 |                               | 0.000                                            | 0.984 | -0.449                       | 36 | 0.656           | -1.710             | 3.805                    | -9.427                                          | 6.006 |
| 0.17                                 |                               | 0.009                                            | 0.923 | -0.287                       | 36 | 0.776           | -1.095             | 3.823                    | -8.850                                          | 6.659 |
| 0.2                                  |                               | 0.009                                            | 0.925 | -0.303                       | 36 | 0.763           | -1.125             | 3.710                    | -8.648                                          | 6.398 |

**Table S3.** Independent sample t-test of convexity of Group I and Group II under the same average chip thickness

| Average chip thickness / mm |                         | Levene's test for equality of variances |       | T-test for equality of means |    |                 |                 |                       |                                           |       |
|-----------------------------|-------------------------|-----------------------------------------|-------|------------------------------|----|-----------------|-----------------|-----------------------|-------------------------------------------|-------|
|                             |                         | F                                       | Sig.  | t                            | df | Sig. (2-tailed) | Mean difference | Std. error difference | 95% Confidence Interval of the Difference |       |
|                             |                         |                                         |       |                              |    |                 |                 |                       | Lower                                     | Upper |
| 0.05                        | Equal variances assumed | 0.082                                   | 0.776 | 0.263                        | 36 | 0.794           | 0.554           | 2.103                 | -3.712                                    | 4.819 |
| 0.08                        |                         | 0.134                                   | 0.717 | -0.088                       | 36 | 0.930           | -0.204          | 2.313                 | -4.894                                    | 4.487 |
| 0.11                        |                         | 0.192                                   | 0.664 | -0.183                       | 36 | 0.856           | -0.438          | 2.389                 | -5.283                                    | 4.407 |
| 0.14                        |                         | 0.245                                   | 0.624 | -0.345                       | 36 | 0.732           | -0.882          | 2.557                 | -6.069                                    | 4.305 |
| 0.17                        |                         | 0.807                                   | 0.375 | -0.653                       | 36 | 0.518           | -1.700          | 2.602                 | -6.976                                    | 3.577 |
| 0.2                         |                         | 0.297                                   | 0.589 | -0.342                       | 36 | 0.735           | -0.747          | 2.187                 | -5.183                                    | 3.688 |
